# Supplementary material for: Weanling gut microbiota composition of a mouse model selectively bred for high voluntary wheel-running behavior
Source: Oxford University Press journal article supplement (doi:10.1242/jeb.245081), 2023-02-02
Supplement: jeb245081supp.pdf [file jeb245081supp.pdf]

**Figure S1**

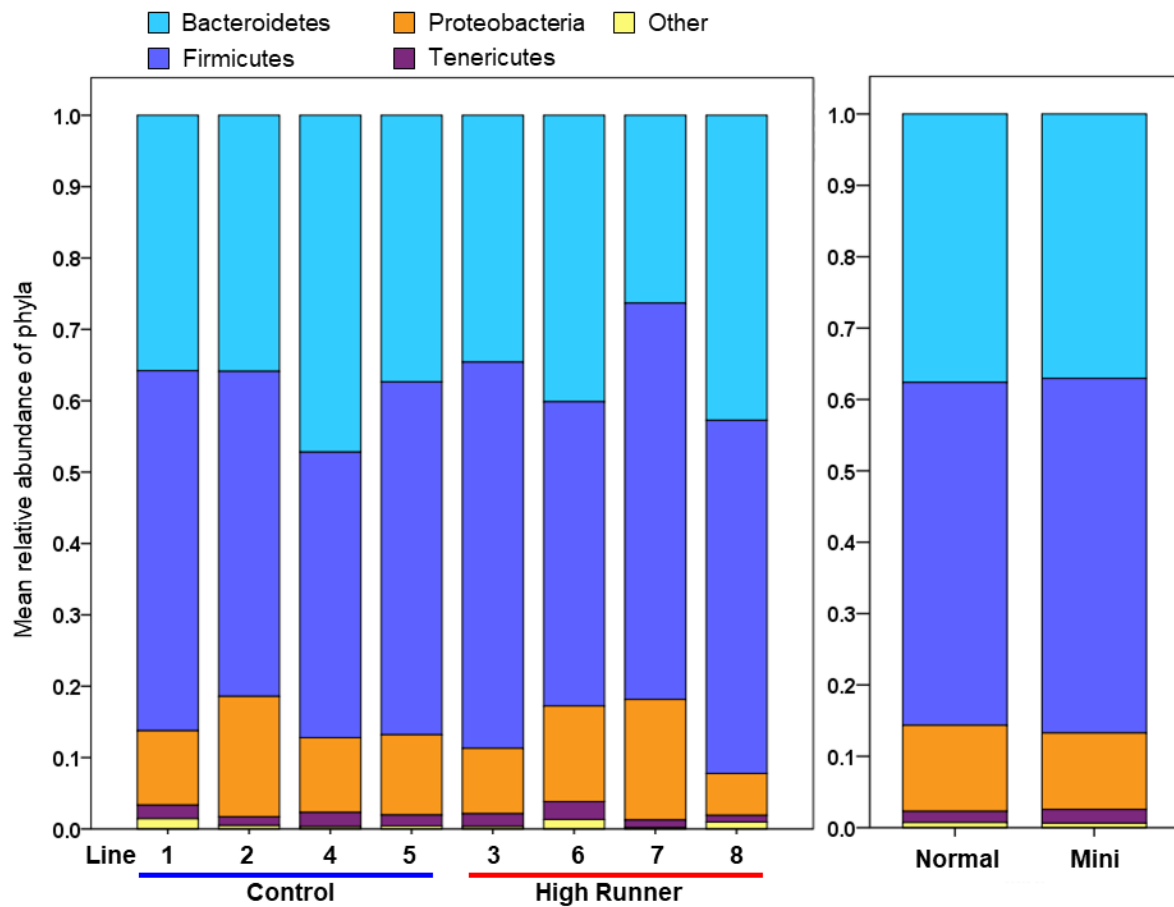

**Fig. S1.** Community composition of the weanling gut microbiome for all experimental mice (N=95) was dominated by Firmicutes ( $48.4 \pm 14\%$ ) (mean  $\pm$  S.D.) and Bacteroidetes ( $37.5 \pm 17.1\%$ ), with additional phyla being much less abundant: Proteobacteria ( $11.8 \pm 8.7\%$ ), Tenericutes ( $1.6 \pm 2\%$ ), Cyanobacteria ( $0.28 \pm 0.53\%$ ), Verrucomicrobia ( $0.24 \pm 1.1\%$ ), Actinobacteria ( $0.09 \pm 0.16\%$ ), Deferribacteres ( $0.08 \pm 0.24\%$ ), Fusobacteria ( $0.0002 \pm 0.0006\%$ ), and TM7 ( $0.0001 \pm 0.0004\%$ ).

## Figure S2

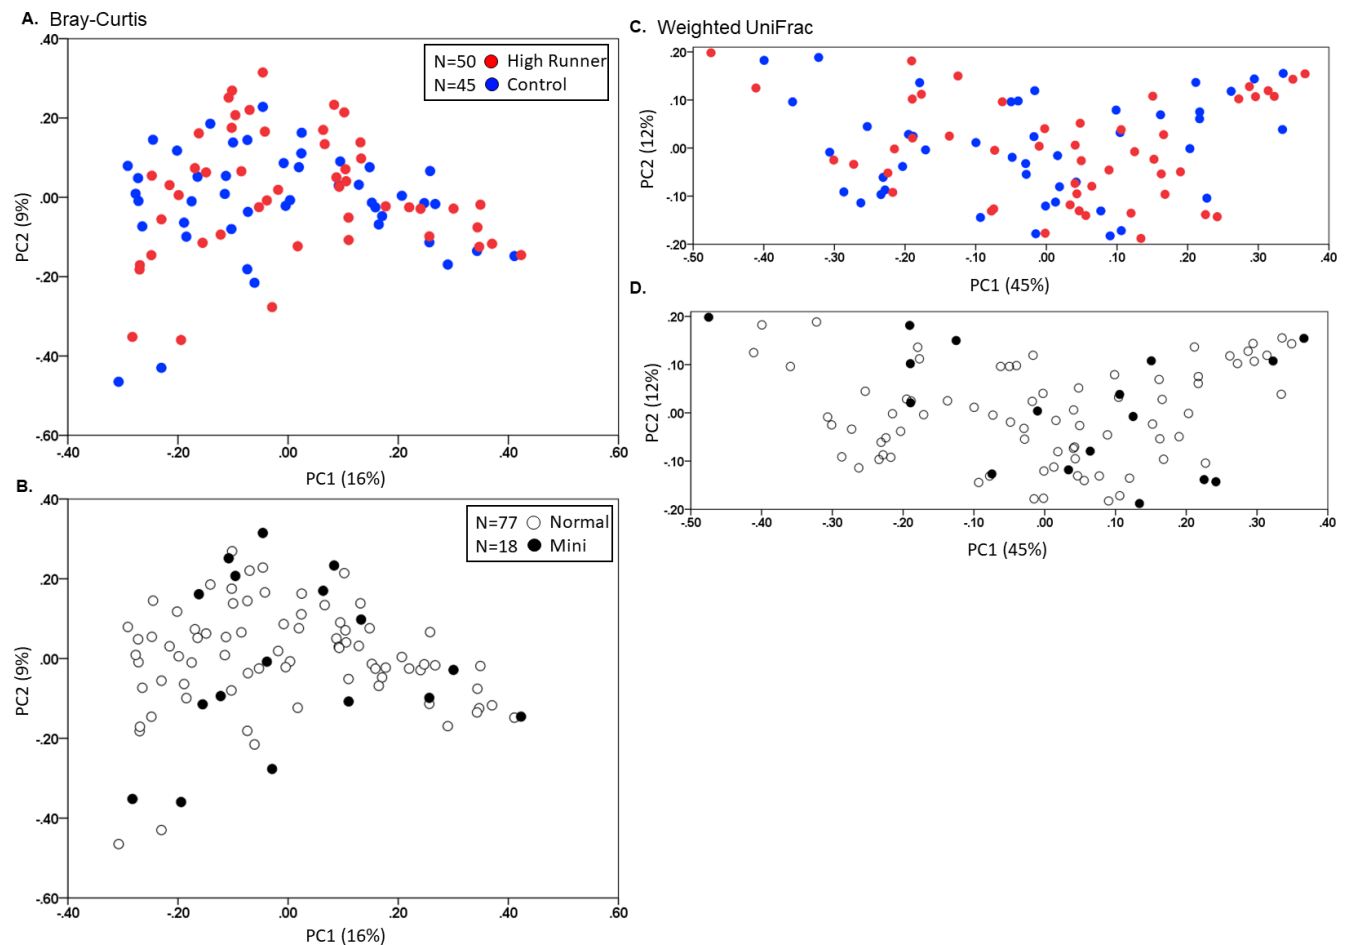

**Fig. S2.** Beta diversity (among experimental groups) of the weanling fecal microbiome based on 16S rRNA sequence data. A and B are PCoA plots based on Bray-Curtis distances, which consider bacterial OTU sequence relative abundances. C and D are PCoA plots based on weighted UniFrac distances, which consider both bacterial OTU sequence relative abundances and phylogenetic distances. PERMANOVAs based on Bray-Curtis or weighted UniFrac distance matrices indicated no statistically significant separation based on either linetype (Bray-Curtis:  $R^2=0.0147$ ,  $P=0.108$ , weighted UniFrac:  $R^2=0.0116$ ,  $P=0.307$ ) or mini-muscle status (Bray-Curtis:  $R^2=0.009$ ,  $P=0.638$ , weighted UniFrac:  $R^2=0.005$ ,  $P=0.773$ ).

**Figure S3**

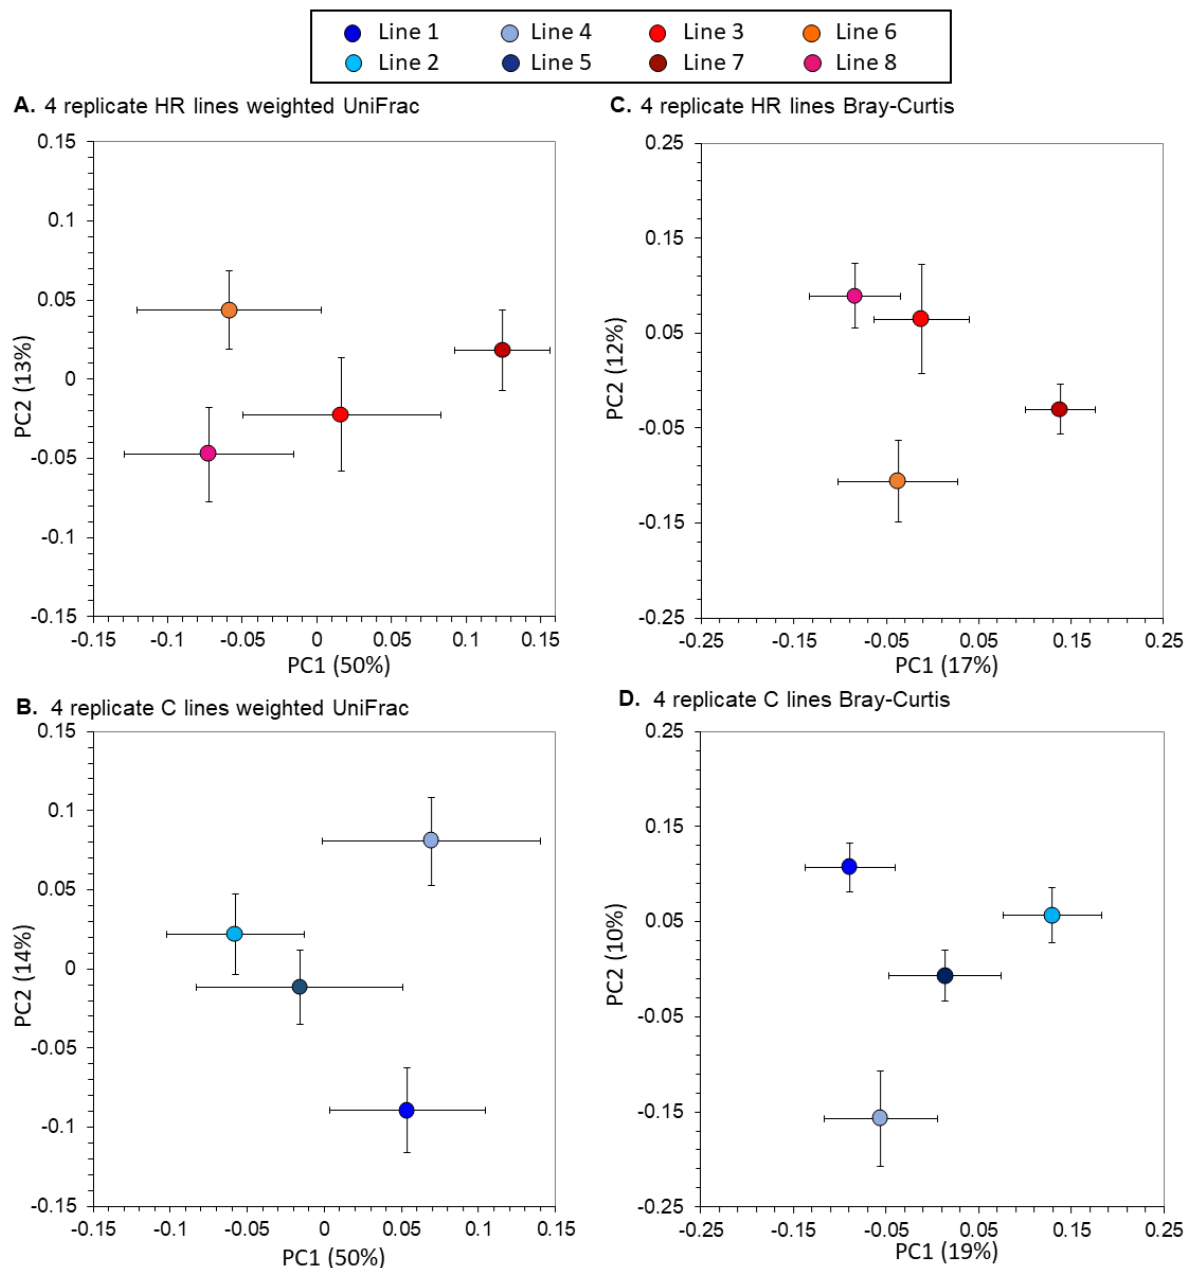

**Fig. S3.** PCoA plots from separate weighted UniFrac and Bray-Curtis analyses of the 4 HR lines (lab designations 3,6,7,8: A and C) and of the 4 C lines (lab designations 1,2,4,5: B and D). Values are means and standard errors for scores on PCoA axes. Separately, we used PERMANOVAs to test for significant separation among the 4 replicate HR lines and among the 4 non-selected C lines. Differences among the 4 replicate C lines were statistically significant based on Bray-Curtis ( $R^2=0.051$ ,  $P=0.005$ ), but not among the 4 replicate HR lines ( $R^2=0.014$ ,  $P=0.839$ ). Weighted UniFrac indicated no significant separation among replicate lines for either linetype (HR lines:  $R^2=0.005$ ,  $P=0.957$ ; C lines:  $R^2=0.030$ ,  $P=0.228$ ).
